1 **Evaluation of biodiversity in estuaries using environmental DNA metabarcoding**

2 **(Short title: Biodiversity of five estuaries)**

3

4

5 Hyojin Ahn<sup>1,2\*</sup>, Manabu Kume<sup>1</sup>, Yuki Terashima<sup>1</sup>, Feng Ye<sup>1,3</sup>, Satoshi Kameyama<sup>3</sup>, Masaki

6 Miya<sup>4</sup>, Yoh Yamashita<sup>1</sup>, Akihide Kasai<sup>2</sup>

7

8

9 <sup>1</sup>Connectivity of Hills, Humans and Oceans Unit, Kyoto University, Oiwake,

10 Kitashirakawa, Sakyo, Kyoto, Japan

11 <sup>2</sup>Faculty of Fisheries Sciences, Hokkaido University, Minatocho, Hakodate, Hokkaido,

12 Japan

13 <sup>3</sup>Center for Environmental Biology and Ecosystem, National Institute for Environmental

14 Studies, Onogawa, Tsukuba, Ibaraki, Japan

15 <sup>4</sup>Department of Ecology and Environmental Sciences, National History Museum and

16 Institute, Aobacho, Chuo, Chiba, Japan

17

18

19 \*Corresponding author

20 E-mail: [ahn.hyojin.4a@kyoto-u.ac.jp](mailto:ahn.hyojin.4a@kyoto-u.ac.jp)

21

22

23

24

25

26 **Funding**

27 This study was conducted under the Link Again Program, part of Connectivity of Hills,  
28 Humans and Oceans, funded by the Nippon Foundation, attained by YY. The funder had no  
29 role in study design, data collection and analysis, decision to publish, or preparation of the  
30 manuscript.

31

32 **Conflict of interest statement**

33 The authors declare no conflicts of interest.

34

35 **Author contributions**

36 Conceptualization: YY, AK. Field work: HA, MK, YT, FY, SK, AK. Experiments and analysis:  
37 HA, MK, MM. Environmental data investigation: FY, SK. Writing manuscript: HA, MK, MM,  
38 AK.

39

40 **Data accessibility statement**

41 All relevant data are included in the Supporting information files. (Data preprocessing steps  
42 and subsequent taxon assignments by pipeline are summarized in S1 Table. Species detected  
43 in this study are listed in S2 Table.)

44

45

46

47

48

49

50

## 51 **Abstract**

52 Biodiversity is an important parameter for the evaluation of the extant environmental  
53 conditions. Here, we used environmental DNA (eDNA) metabarcoding to investigate fish  
54 biodiversity in five different estuaries in Japan. Water samples for eDNA were collected from  
55 river mouths and adjacent coastal areas of two estuaries with high degrees of development  
56 (the Tama and Miya Rivers) and three estuaries with relatively low degrees of development  
57 (the Aka, Takatsu, and Sendai Rivers). A total of 182 fish species across 67 families were  
58 detected. Among them, 11 species occurred in all the rivers studied. Rare fishes including  
59 endangered species were successfully detected in rich natural rivers. Biodiversity was the  
60 highest in the Sendai River and lowest in the Tama River, reflecting the degree of human  
61 development along each river. Even though nutrient concentration was low in both the Aka  
62 and Sendai Rivers, the latter exhibited greater diversity, including many tropical or  
63 subtropical species, owing to its more southern location. Species composition detected by  
64 eDNA varied among rivers, reflecting the distribution and migration of fishes. Our results are  
65 in accordance with the ecology of each fish species and environmental conditions of each  
66 river, suggesting the potential of eDNA for non-invasive assessment of aquatic biodiversity.

67

68

69

70

71

72

73

74

## 75 **Introduction**

76 As fisheries share common ecosystems and natural resources, concern has mounted over the  
77 impact of fishing on aquatic ecosystems [1]. To ensure sustainable fishery production, it is  
78 essential that organisms are reared in a balanced and healthy environment. At the same time,  
79 protecting rare and charismatic species has also gained importance [2]. One of the evaluation  
80 criteria for a balanced and healthy ecosystem is biodiversity.

81 Threats to biodiversity in aquatic ecosystems have been an issue for decades because  
82 of loss of productive habitats [3, 4]. Such environmental perturbations are caused mainly by  
83 human influences, through both direct damage to aquatic ecosystems and indirect pollution  
84 with sediments, excessive nutrients, and other chemicals. Terrestrial pollutants from  
85 agriculture, deforestation, and construction flow into coastal areas through the hydrologic  
86 system, mainly through rivers [5-7]. Therefore, humans affect first the estuaries and coastal  
87 areas, whose environmental conservation is indicated by the extent of biodiversity.  
88 Consequently, comprehensive monitoring of biodiversity is essential for conservation of  
89 ecosystems and sustainable fisheries production.

90 Although a number of studies on biodiversity have been reported [8, 9], most of them  
91 have focused on local areas of ecologic or economic importance to aquaculture [10], unique  
92 ecosystems (e.g., coral reefs, mangroves, tropical islands) [4, 6], and other services [11]. In  
93 contrast, biodiversity evaluations that include various regions at the same time have not been  
94 carried out, because traditional monitoring methods (observations and/or capture) require  
95 considerable financial and labor resources to cover a wide range of habitats [12, 13]. Also,  
96 particularly for rare and endangered species, monitoring using traditional methods can  
97 negatively affect the organisms and their habitat during the survey.

98 Here, we tested environmental DNA (eDNA) metabarcoding as a non-invasive and  
99 cost-effective method for monitoring the biodiversity of fishes [14] in multiple estuaries at a

100 nation-wide scale. Environmental DNA, defined as genetic material released from organisms  
101 into the environment, has become a convenient tool for molecular biology and ecology over  
102 the past decade [15, 16]. By sampling soil, sediment, water, and ice, species can be detected  
103 even when they cannot be observed visually. This technique was first reported with regard to  
104 amphibians [17], followed by fish [18, 19], crustaceans [20], mammals [21], and plants [22].  
105 In addition, combined with next-generation sequencing technology, eDNA enables the  
106 processing of massive DNA sequencing data for the identification of various taxa in multiple  
107 samples simultaneously, which is termed eDNA metabarcoding [23]. This method is not only  
108 practical for assessment of biodiversity, but is also useful to for detection of non-invasive  
109 alien, rare, and endangered species while performing a diversity survey [16, 24, 25]. We used  
110 specially designed universal primers covering 880 fish species belonging to 51 orders, 242  
111 families, and 623 genera (MiFish-U), and 160 elasmobranch species belonging to 12 orders,  
112 39 families, and 77 genera (MiFish-E) for the metabarcoding process [26].

113 Five rivers, indicative of different geographical features and human impact on  
114 biodiversity, were selected for this study. As Japan stretches extensively from north to south,  
115 the latitude of the target rivers varied from 31.85°N to 38.85°N (Fig 1a). The catchment area  
116 of the rivers showed considerable variation from natural forest to a megacity. We  
117 hypothesized that fish diversity detected from the eDNA survey would reflect those  
118 environmental characteristics.

119

120 **Fig 1. Sampling stations.** Location of (a) the five rivers surveyed in this study. Maps  
121 showing the location of sampling stations RM (river mouth), L1 (left 500 m), L2 (left 1 km),  
122 R1 (right 500 m), and R2 (right 1 km) of (b) Aka River, (c) Tama River, (d) Miya River, (e)  
123 Takatsu River, and (f) Sendai River. The satellite photos from (b) to (f) were provided by  
124 Google Maps (2019 Google, TerraMetrics, Data SIO, NOAA, U.S. Navy, NGA, GEBCO).

125 Scale bar = 500 m.

126

## 127 **Materials and methods**

### 128 **Water sampling**

129 Five rivers (Aka, Tama, Miya, Takatsu, and Sendai) with different geographical features and  
130 degrees of urbanization were selected. The water at five stations (at the river mouth, and  
131 approximately 500 m and 1 km along the coast on both the left and right sides of the river  
132 mouth) was sampled (Fig 1) in summer (June or July) 2018. At the river mouth, the water was  
133 sampled twice (at high and low tides), and therefore, there was a total of six samples collected  
134 from each estuary. For the Tama River, water samples were taken from a boat because the  
135 estuary is located between Haneda Airport and the Kawasaki industrial complex, and we  
136 could not reach the area from the shore. Moreover, because the airport restricts access to any  
137 type of boat near the runway, we could only collect samples from one station (at about 1 km  
138 from the river mouth) on each side of the Tama River estuary and collected four samples  
139 instead of six samples (Table 1).

140

141 **Table 1. Environmental conditions of sampling stations. HT: river mouth at high tide;**

142 **LT: river mouth at low tide; L1: left 500 m; L2: left 1 km; R1: right 500 m; R2: right 1**

143 **km**

| Aka River (17th, July)  | HT   | LT   | L1   | L2   | R1   | R2   |
|-------------------------|------|------|------|------|------|------|
| Water temp (°C)         | 24.1 | 26   | 26   | 26   | 25.4 | 25.5 |
| Salinity                | 6.4  | 7.7  | 18.8 | 29   | 20.1 | 29.7 |
| Filtered water (mL)     | 200  | 200  | 600  | 600  | 600  | 600  |
| Tama River (29th, June) | HT   | LT   | L1   | L2   | R1   | R2   |
| Water temp (°C)         | 22.3 | 26.6 | -    | 24.7 | 23.5 | -    |
| Salinity                | 29.1 | 22.2 | -    | 24.6 | 27.9 | -    |

|                            |      |      |       |       |       |       |
|----------------------------|------|------|-------|-------|-------|-------|
| Filtered water (mL)        | 400  | 400  | -     | 400   | 400   | -     |
| Miya River (7th, June)     | HT   | LT   | L1    | L2    | R1    | R2    |
| Water temp (°C)            | 23   | 22.5 | 22.2  | 22.6  | 23.1  | 24.7  |
| Salinity                   | 7.45 | 10.4 | 25.53 | 23.39 | 20.64 | 21.92 |
| Filtered water (mL)        | 700  | 600  | 200   | 500   | 600   | 600   |
| Takatsu River (16th, July) | HT   | LT   | L1    | L2    | R1    | R2    |
| Water temp (°C)            | 26.7 | 24.1 | 29    | 29    | 27    | 27    |
| Salinity                   | 0.1  | 0.1  | 22.4  | 23.9  | 15.1  | 15.5  |
| Filtered water (mL)        | 500  | 600  | 500   | 500   | 500   | 600   |
| Sendai River (27th, July)  | HT   | LT   | L1    | L2    | R1    | R2    |
| Water temp (°C)            | 28.7 | 30   | 29.7  | 29.5  | 29.1  | 29.3  |
| Salinity                   | 22.2 | 6.8  | 14.2  | 14.6  | 28.3  | 29.6  |
| Filtered water (mL)        | 500  | 500  | 500   | 600   | 1000  | 1000  |

144

145 All sampling and filtering equipment was cleaned with 10% commercial bleach  
 146 solution. The surface water at each station was sampled by a bucket and immediately filtered  
 147 using a 0.45- $\mu$ m polyethersulfone membrane Sterivex filter unit (Merck Millipore, Billerica,  
 148 MA, USA) and immersed in 1.6 mL RNAlater Stabilization Solution (Thermo Fisher  
 149 Scientific, Waltham, MA, USA). Water temperature and salinity were measured during  
 150 sampling. The volume of water samples varied from 200 to 1000 mL depending on turbidity  
 151 (Table 1). We assumed that variation in sample volume did not affect diversity as we  
 152 confirmed no correlation between the volume and eDNA concentration ( $r^2 = 0.045$ ). As a  
 153 negative control, 500 mL of pure water was filtered at each river. Filter units were frozen at -  
 154 30°C until DNA extraction.

155

## 156 **eDNA extraction**

157 Total DNA was extracted from the Sterivex filter units using a DNeasy Blood and Tissue Kit  
 158 (Qiagen, Hilden, Germany), following the procedure described by Miya et al. [27] and the

159 manufacturer's protocol with minor modifications. After removing RNAlater by  
160 centrifugation ( $4,000 \times g$  for 2 min), the filter unit was rinsed with sterilized distilled water.  
161 For the lysis of eDNA attached to the membrane, proteinase K (20  $\mu$ L) and lysis buffer AL  
162 (200  $\mu$ L) were applied to the filter unit and incubated inside a  $56^{\circ}\text{C}$  preheated oven for about  
163 20 min. The roller was turned on to enable even collection of DNA from the membrane. After  
164 the incubation, the spin column was centrifuged at  $4,000 \times g$  for 2 min to collect DNA, to  
165 which 200  $\mu$ L of absolute ethanol was then added and mixed well. The resulting solution was  
166 transferred to a spin column, centrifuged ( $6,000 \times g$  for 1 min), and then purified twice using  
167 wash buffer (AW1 and AW2). After the purification steps, DNA was eluted with the elution  
168 buffer (110  $\mu$ L) provided in the kit. Extracted DNA was stored in a LoBind tube at  $-30^{\circ}\text{C}$ .  
169

## 170 **Library preparation and sequencing**

171 Samples were sent to the Kazusa DNA Research Institute (Chiba, Japan) for paired-end  
172 library preparation and next-generation sequencing (MiSeq) as detailed by Miya et al. [26].

173 A two-step PCR for paired-end library preparation was employed in the MiSeq  
174 platform (Illumina, San Diego, CA, USA). For the first-round PCR (1st PCR), a mixture of  
175 the following four primers was used: MiFish-U-forward (5'-ACA CTC TTT CCC TAC ACG  
176 CTC TTC CGA TCT NNN GTC GGT AAA ACT CGT GCC AGC-3'), MiFish-U-reverse (5'-  
177 GTG ACT GGA GTT CAG ACG TGT GCT CTT CCG ATC TNN NNN NCA TAG TGG  
178 GGT ATC TAA TCC CAG TTT G-3'), MiFish-E-forward-v2 (5'-ACA CTC TTT CCC TAC  
179 ACG CTC TTC CGA TCT NNN RGT TGG TAA ATC TCG TGC CAG C-3'), and MiFish-E-  
180 reverse-v2 (5'-GTG ACT GGA GTT CAG ACG TGT GCT CTT CCG ATC TNN NNN NGC  
181 ATA GTG GGG TAT CTA ATC CTA GTT TG-3'). These primer pairs amplified a  
182 hypervariable region of the mitochondrial 12S rRNA gene (*ca.* 172 bp; hereafter called  
183 "MiFish sequence") and appended primer-binding sites (5' ends of the sequences before six



184 Ns) for sequencing at both ends of the amplicon. The six random bases (Ns) were used in the  
185 middle of these primers to enhance cluster separation in the flow cells during initial base call  
186 calibrations of the MiSeq platform.

187 The 1st PCR was carried out with 35 cycles of a 12- $\mu$ L reaction volume containing  
188 6.0  $\mu$ L 2  $\times$  KAPA HiFi HotStart ReadyMix (KAPA Biosystems, Wilmington, MA, USA),  
189 2.8  $\mu$ L of a mixture of the four MiFish primers in equal volumes (U/E forward and reverse  
190 primers; 5  $\mu$ M), 1.2  $\mu$ L sterile distilled water, and 2.0  $\mu$ L eDNA template (a mixture of the  
191 duplicated eDNA extracts in equal volumes). To minimize PCR dropouts during the 1st PCR,  
192 eight replications were performed for the same eDNA template using a strip of eight tubes  
193 (0.2  $\mu$ L). After an initial 3 min denaturation at 95°C, the thermal cycle profile (35 cycles) was  
194 as follows: denaturation at 98°C for 20 s, annealing at 65°C for 15 s, and extension at 72°C  
195 for 15 s. There was a final extension at 72°C for 5 min. The 1st PCR blanks were prepared  
196 during this process in addition to negative controls for each river.

197 After completion of the 1st PCR, equal volumes of the PCR products from the eight  
198 replications were pooled in a single 1.5-mL tube and purified using a GeneRead Size  
199 Selection kit (Qiagen) following the manufacturer's protocol for the GeneRead DNA Library  
200 Prep I Kit. Accordingly, column purification was performed twice to completely remove  
201 adapter dimers and monomers. Subsequently, the purified target products (*ca.* 300 bp) were  
202 quantified using TapeStation D1000 (Agilent Technologies, Tokyo, Japan), after diluting them  
203 to 0.1 ng  $\mu$ L<sup>-1</sup> with Milli Q water. The diluted products were employed as templates for the  
204 second-round PCR (2nd PCR).

205 For the 2nd PCR, the following two primers were used to append dual-index  
206 sequences (eight nucleotides indicated by Xs) and flow cell-binding sites for the MiSeq  
207 platform (5' ends of the sequences before eight Xs): 2nd-PCR-forward (5'-AAT GAT ACG  
208 GCG ACC ACC GAG ATC TAC ACX XXX XXX XAC ACT CTT TCC CTA CAC GAC

209 GCT CTT CCG ATC T–3') and 2nd-PCR-reverse (5'–CAA GCA GAA GAC GGC ATA CGA  
210 GAT XXX XXX XXG TGA CTG GAG TTC AGA CGT GTG CTC TTC CGA TCT–3').

211 The 2nd PCR was carried out with 10 cycles in a 15- $\mu$ L reaction volume containing  
212 7.5  $\mu$ L  $2 \times$  KAPA HiFi HotStart ReadyMix, 0.9  $\mu$ L of each primer (5  $\mu$ M), 3.9  $\mu$ L sterile  
213 distilled water, and 1.9  $\mu$ L template (0.1 ng  $\mu$ L<sup>-1</sup> except for the three blanks). After an initial 3  
214 min denaturation at 95°C, the thermal cycle profile (10 cycles) was as follows: denaturation at  
215 98°C for 20 s, combined annealing and extension at 72°C for 15 s. There was a final  
216 extension at 72°C for 5 min. The blank for the 2nd PCR was prepared during this process as  
217 well as to monitor any contamination.

218 All dual-indexed libraries were pooled in equal volumes into a 1.5-mL tube. Then, the  
219 pooled dual-indexed library was separated on a 2% E-Gel Size Select agarose gel (Life  
220 Technologies, Carlsbad, CA, USA) and the target amplicons (*ca.* 370 bp) were retrieved from  
221 the recovery wells using a micropipette. The concentration of the size-selected libraries was  
222 measured using a Qubit dsDNA HS assay kit and a Qubit fluorometer (Life Technologies).  
223 The libraries were diluted to 12.0 pM with HT1 buffer (Illumina) and sequenced on the  
224 MiSeq platform using a MiSeq v2 Reagent Kit for  $2 \times 150$  bp PE (Illumina) following the  
225 manufacturer's protocol.

226

## 227 **Data preprocessing and taxonomic assignment**

228 Data preprocessing and analysis of MiSeq raw reads were performed with a specially  
229 developed pipeline (MiFish ver. 2.3) from four runs using USEARCH v10.0.240 [28]. The  
230 following steps (summarized in S1 Table) were applied: (1) Forward (R1) and reverse (R2)  
231 reads were merged by aligning them with the *fastq\_mergepairs* command. During this process,  
232 the following reads were discarded: low-quality tail reads with a cut-off threshold set at a  
233 quality (Phred) score of 2, reads that were too short (<100 bp) after tail trimming, and paired

234 reads with multiple differences (>5 positions) in the aligned region (*ca.* 65 bp). (2) Primer  
235 sequences were removed from merged reads using the *fastx\_truncate* command. (3) Reads  
236 without primer sequences underwent quality filtering using the *fastq\_filter* command to  
237 remove low-quality reads with an expected error rate >1% and reads that were too short (<120  
238 bp). (4) Preprocessed reads were dereplicated using the *fastx\_uniques* command and all  
239 singletons, doubletons, and tripletons were removed from subsequent analysis as  
240 recommended [28]. (5) Dereplicated reads were denoised using the *unoise3* command to  
241 generate amplicon sequence variants (ASVs) without any putatively chimeric and erroneous  
242 sequences [29]. (6) Finally, ASVs were subjected to taxonomic assignments of species names  
243 (metabarcoding operational taxonomic units; MOTUs) using the *usearch\_global* command  
244 with sequence identity >98.5% to the reference sequences and a query coverage  $\geq$ 90% (two  
245 nucleotide differences allowed). ASVs with sequence identities of 80–98.5% were tentatively  
246 assigned “U98.5” labels before the corresponding species name with the highest identity (*e.g.*,  
247 U98.5\_*Pagrus\_major*) and they were subjected to clustering at the 0.985 level using the  
248 *cluster\_smallmem* command. In an incomplete reference database, this clustering step enables  
249 the detection of multiple MOTUs under an identical species name. We annotated such  
250 multiple MOTUs with “gotu1, 2, 3...” and tabulated all of these outputs (MOTUs plus  
251 U98.5\_MOTUs) with read abundances. We excluded ASVs with sequence identities <80%  
252 (saved as “no\_hit”) from the above taxonomic assignments and downstream analyses because  
253 all of them were found to be non-fish organisms.

254           As a reference database, we assembled MiFish sequences from 5,691 fish species in  
255 Masaki Miya’s laboratory. In addition, we downloaded all fish whole mitochondrial genome  
256 and 12S rRNA gene sequences from NCBI as of 26 June 2017 and extracted MiFish  
257 sequences using a custom Perl script [26]. We combined the MiFish sequences from the two  
258 sources in a FASTA format and used the combined sequences as the custom reference

259 database for taxonomic assignments. The final reference database consisted of 27,871  
260 sequences from 7,555 species belonging to 2,612 genera and 464 families.

261 We refined the above automatic taxonomic assignments with reference to family-level  
262 phylogenies based on MiFish sequences from MOTUs, U98.5\_MOTUs, and the reference  
263 sequences from those families. For each family, we assembled representative sequences (most  
264 abundant reads) from MOTUs and U98.5\_MOTUs, and added all reference sequences from  
265 that family and an outgroup (a single sequence from a closely-related family) in a FASTA  
266 format. We subjected the FASTA file to multiple alignment using MAFFT [30] with a default  
267 set of parameters. We constructed a neighbor-joining tree with the aligned sequences in  
268 MEGA7 [31] using Kimura two-parameter distances. The distances were calculated using  
269 pairwise deletion of gaps and among-site rate variations modeled with gamma distributions  
270 (shape parameter = 1). We performed bootstrap resamplings ( $n = 100$ ) to estimate statistical  
271 support for internal branches of the neighbor-joining tree and to root the tree with the  
272 outgroup.

273 We inspected a total of 82 family-level trees and revised the taxonomic assignments.  
274 For U98.5\_MOTUs placed within a monophyletic group consisting of a single genus, we  
275 assigned that genus to unidentified MOTUs with “sp” plus sequential numbers (e.g., *Pagrus*  
276 sp1, sp2, sp3, ...). For the remaining MOTUs ambiguously placed in the family-level tree, we  
277 assigned the family name with “sp” plus sequential numbers (e.g., Sparidae sp1, sp2, sp3, ...).

278 All negative controls in sampling stations and PCR blanks were also analyzed using  
279 this pipeline. The reads corresponding to every fish detected in the negative control were  
280 deleted (S1 Table).

281

## 282 **Species verification**

283 The species obtained by pipeline still needed to be verified because sequencing results

284 comprised only a short region (170 bp) of 12S rRNA (Miya et al., 2015), and similar  
285 sequences might correspond to different species. Also, multiple species could be incorporated  
286 into a single species, and *vice versa*. We checked all species on the list with the original  
287 aligned sequences using the NCBI Basic Local Alignment Search Tool  
288 (<http://blast.ncbi.nlm.nih.gov/Blast.cgi>), and applied MEGA7 [31] to construct a phylogenetic  
289 tree for all stations characterized by occurrence of the same species. When several species  
290 shared the same or similar (>99%) aligned sequence, we confirmed the species identity by  
291 referring to species distribution reported by the IUCN (<https://www.iucnredlist.org>), FishBase  
292 (<http://www.fishbase.de>), illustrated books of Japanese fishes [32-34], and personal  
293 communications. For example, the Japanese black porgy (*Acanthopagrus schlegelii*) and the  
294 Okinawa seabream (*Acanthopagrus sivicolus*) have the same aligned sequence, but the  
295 Okinawa seabream cannot exist in the waters of any station from the present study. On the  
296 contrary, we combined two or more species that were considered to be local variations, even if  
297 their sequences differed substantially.

298       Species whose reads number amounted to <0.05% of total reads were deleted because  
299 they were potentially caused by contamination, as indicated by Andruszkiewicz et al. [35]  
300 with some modifications. If species that were obviously not expected in this area were  
301 detected, but represented commonly consumed food items, they were regarded as  
302 contamination and removed as well.

303

## 304 **Estimates of biodiversity**

305 Even if fish biomass could be reportedly determined by eDNA [36], eDNA has been limited  
306 to certain species. Moreover, it has not been applied to metabarcoding because of species-  
307 specific amplification rates [37], environment-dependent degradation rates [18, 38], and PCR  
308 inhibition by environmental factors [12, 14]. Therefore, the estimate of biomass requires a

309 complex model and the possible use of eDNA for this purpose needs to be verified.  
310 Biodiversity is sometimes calculated by functions such as ‘number of species’ and ‘biomass;’  
311 however, as biomass information was not available in the present study, we considered  
312 ‘species richness’ as a proxy for ‘biodiversity.’  
313

## 314 **Environmental data set**

315 Data regarding nutrients were obtained from the Ministry of the Environment of Japan  
316 (<http://water-repo.env.go.jp/water-repo/>). We used the annual mean value of nutrient  
317 concentration combining total nitrogen (TN) and total phosphorus (TP) published in the  
318 Measurement Results of Water Quality in Public Waters in FY 2016 (Ministry of the  
319 Environment) as a water quality index of the river. The annual mean value is based on 6–12  
320 measurements a year at each monitoring point. The monitoring points corresponding to the  
321 target watersheds (points using the TN and TP values) were the most downward points of  
322 each river.

323 The revetment rate was calculated by measuring the distance of artificially protected  
324 areas, such as concrete-sealed piers or concrete tetrapods, within a distance of 3 km on both  
325 sides of the river and shore from the river mouth, using Google Earth Pro  
326 (<http://support.google.com/earth/answer/21995?hl=ja>).

327

## 328 **Statistical analysis**

329 To examine the effect of salinity or water temperature on the ratio of freshwater, brackish, or  
330 seawater species, we used general linear models (GLMs) with a negative binomial  
331 distribution and a log link function. To this end, we applied the *glm.nb* function in the *MASS*  
332 package. The number of freshwater, brackish, or seawater species in each sample was used as

333 a response variable; salinity or water temperature were explanatory variables; and the total  
 334 number of fish species represented an offset term. To verify the accuracy of the six models,  
 335 the areas under the Receiver Operating Characteristic curves (AUCs) were calculated, using  
 336 the *roc* function in the *pROC* package [39]. Accuracy was defined as low (AUC < 0.7),  
 337 moderate ( $0.7 \leq \text{AUC} < 0.9$ ), and high (AUC  $\geq 0.9$ ) (Table 2).

338

339 **Table 2. Summary of models<sup>†</sup> used to assess the effect of each environmental factor on**  
 340 **the rate of freshwater, brackish, or marine fish**

| Variable                           | Freshwater species | Brackish water species | Seawater species |
|------------------------------------|--------------------|------------------------|------------------|
| <b>Effect of salinity</b>          |                    |                        |                  |
| (Intercept)                        | 2.615***           | 2.884***               | 1.688***         |
| Salinity                           | -0.046**           | -0.008                 | 0.042***         |
| AUC                                | 0.839              | 0.825                  | 0.838            |
| <b>Effect of water temperature</b> |                    |                        |                  |
| (Intercept)                        | 4.377**            | 2.114***               | -1.525*          |
| Water temperature                  | -0.098             | 0.024                  | 0.152***         |
| AUC                                | 0.856              | 0.841                  | 0.961            |

341 <sup>†</sup>Based on comparison of null and full models in general linear model results;  $\beta$  coefficients of  
 342 predictor variables are shown.

343 Abbreviations: AUC, area under the Receiver Operating Characteristic curve

344 \* $p < 0.05$ , \*\*  $p < 0.01$ , and \*\*\* $p < 0.001$  in a Ward test

345

346 To examine the human impact on the number of fish species, we again applied the  
 347 above GLMs using the *glm.nb* function in the *MASS* package. The number of species in each  
 348 river was used as a response variable. We used data about TN, TP, and revetment rates as  
 349 indicators of human impact. However, both TN and TP had a high variance inflation factor  
 350 (VIF), which indicated high multicollinearity among these variables (VIF = 26.1 and 15.6 for  
 351 TN and TP, respectively, VIF = 7.3 for revetment rate). After removal of TP, there was no

352 multicollinearity between TN and revetment rate (VIF = 7.0), so we used TN and revetment  
353 rates as explanatory variables for our GLM analyses. These VIF values were calculated using  
354 the *vif* function in the *car* package [40]. The number of samples was used as an offset variable.  
355 For model selection among GLMs, we used the *dredge* function in the *MuMIn* package [41].  
356 The best model was selected using Akaike's information criterion (AIC), which stipulates that  
357 the best model for any candidate set applied to a given data set is that with the lowest AIC  
358 value. Following Burnham and Anderson [42], models with  $\Delta\text{AIC} < 2$  were assumed to be  
359 reasonable alternatives to the best model and thus were retained (Table 3).

360

361 **Table 3. Summary of models with  $\Delta\text{AIC} < 2^\dagger$  used to assess the effect of human impact**  
362 **on the number of fish species**

| Model | Variable    |           |           | Weight | df | AIC   | $\Delta\text{AIC}$ |
|-------|-------------|-----------|-----------|--------|----|-------|--------------------|
|       | (Intercept) | TN        | Revetment |        |    |       |                    |
| 1     | 4.557***    | -0.214*** |           | 0.608  | 3  | 76.02 | 0                  |
| 2     | 4.552***    | -0.24     | 0.001     | 0.231  | 4  | 77.96 | 1.94               |

363 <sup>†</sup>Based on comparison of null and full models in general linear model results;  $\beta$  coefficients of  
364 predictor variables are shown.

365 Abbreviations: AIC, Akaike's information criterion; TN: total nitrogen

366 \*\*\* $p < 0.001$  in a Ward test

367

368 All statistical tests were carried out using R software ver. 3.5.2 [43].

369

## 370 Results

### 371 Species occurrence

372 A total of 182 species from 67 families were detected in the present eDNA survey (S2 Table).

373 Most species (94) occurred in the Sendai River and fewest (25) in the Tama River; whereas



374 the Aka, Miya, and Takatsu Rivers contributed with 64, 72, and 81 species, respectively (Fig  
375 2a). Eleven species commonly observed in Japanese coastal areas (*Acanthogobius flavimanus*,  
376 *Acanthopagrus schlegelii*, *Cyprinus carpio*, *Engraulis japonicus*, *Girella punctata*, *Konosirus*  
377 *punctatus*, *Lateolabrax japonicus*, *Mugil cephalus*, *Parablennius yatabei*, *Platycephalus* sp. 2,  
378 and *Takifugu* spp.) were reported in all five rivers. Among them, the Japanese anchovy *E.*  
379 *japonicus* and dotted gizzard shad *K. punctatus* are commercially important; whereas the  
380 yellowfin goby *A. flavimanus*, blackhead seabream *A. schlegelii*, and *Platycephalus* sp. are  
381 popular for recreational fishing. Two salmonid species, *Oncorhynchus masou* and  
382 *Oncorhynchus mykiss*, known to inhabit colder and rural rivers were detected only in the Aka  
383 and Takatsu Rivers (S2 Table). Commercially and ecologically important fishes, such as the  
384 Japanese sardine *Sardinops melanostictus* and mackerel *Scomber* spp., were widely detected  
385 in all rivers except for the Sendai River.

386

387 **Fig 2. Species richness.** Number of species present in (a) all five rivers and at each station, (b)  
388 Aka River, (c) Tama River, (d) Miya River, (e) Takatsu River, and (f) Sendai River. HT: river  
389 mouth at high tide; LT: river mouth at low tide; L1: left 500 m; L2: left 1 km; R1: right 500 m;  
390 R2: right 1 km; S: seawater species; B: brackish water species having a wide range of salinity  
391 tolerance including migrating fishes; F: freshwater species

392

393 *Cobitis takatsuensis*, *Hemistrygon akajei*, *Trachurus japonicus* (NT), *C. carpio*,  
394 *Hippocampus mohnikei* (VU), *Anguilla japonica*, and *Epinephelus akaara* (EN) are  
395 endangered according to the IUCN red list (<https://www.iucnredlist.org>). Moreover, *C.*  
396 *takatsuensis* and *A. japonica* are registered as endangered species at the EN level by the  
397 Ministry of the Environment of Japan ([www.env.go.jp](http://www.env.go.jp)). An additional 11 species, detected by  
398 eDNA, including *Eutaeniichthys gilli*, *Gymnogobius castaneus*, *Misgurnus anguillicaudatus*,

399 *Oncorhynchus masou*, *Sarcocheilichthys variegatus*, *Tanakia lanceolata* (NT), *Cottus kazika*,  
400 *Cottus reinii*, *Odontobutis hikimius* (VU), *Cottus pollux*, and *Gymnogobius scrobiculatus*  
401 (EN), are considered as endangered in Japan (<http://ikilog.biodic.go.jp/Rdb/env>).

402

### 403 **Habitat composition of each river**

404 A detailed station-by-station analysis (Fig 2b–f) revealed that in the Tama River, freshwater  
405 species were not detected from all stations at the estuary (Fig 2c; S2 Table). Only a small  
406 proportion of freshwater species occurred at the river mouth and at the station 500 m left  
407 along the coast from the mouth of the Sendai River, while no freshwater species occurred at  
408 the other stations (Fig 2f). In the Aka River, freshwater species accounted for 30–40% of total  
409 species at the river mouth, but decreased quickly to fewer than 10% along both the left and  
410 right sides of the coast. In contrast, seawater species increased at stations in the coastal area  
411 (Fig 2b). Similar results were obtained for the Takatsu River, with the proportion of  
412 freshwater species decreasing and that of seawater species highly increasing in the coastal  
413 area (Fig 2e). A different result was observed regarding the number of species in the Aka and  
414 Takatsu Rivers (Fig 2b and 2e). More species were detected at the river mouth (37 species at  
415 high tide and 34 species at low tide) of the Aka River than in its surrounding coastal area (19–  
416 25 species). In the Takatsu River, diversity was higher in the coastal area (49–59 species) than  
417 at the river mouth (32 at high tide and 33 species at low tide). In the Miya River, freshwater  
418 species decreased in the coastal area, except for the station at 500 m on the left side (Fig 2d).  
419 The number of species in the Sendai River decreased during low tide (27 species) compared  
420 to high tide (41 species) at the river mouth (Fig 2f). In the Tama River, species composition  
421 changed at the river mouth as the tide switched from high to low and seawater species  
422 decreased on the low tide, even though the total number of species (12 species) remained the  
423 same (Fig 2c). No distinguishable change was found between high and low tides at the river

424 mouth of the other three rivers.

425           The best models examining the effect of salinity or water temperature on the ratio of  
426 freshwater, brackish, or seawater species could be obtained with relatively high accuracy  
427 (AUC = 0.825–0.961; Table 2). The proportion of freshwater species decreased as salinity  
428 increased ( $p < 0.01$ ), whereas that of seawater species increased as salinity increased ( $p <$   
429  $0.001$ ) for all five rivers. In contrast, the proportion of brackish water fish was not affected by  
430 salinity. On the one hand, the proportion of seawater species increased at higher water  
431 temperatures ( $p < 0.001$ ). On the other hand, water temperature had no significant effect on  
432 brackish and freshwater species ( $p > 0.05$ ).

433

## 434 **Relationships between environmental factors and the number of** 435 **species**

436 Nutrient concentration (TN and TP) was highest in the Tama River, which flows through a  
437 mega city (Fig 1), and relatively low in the Aka and Takatsu Rivers, which flow through rural  
438 areas. A similar result was obtained regarding the revetment rate (Figs 1 and 3).

439           Among the GLMs for evaluating the effect of human impact on the number of fish  
440 species, two models with  $\Delta AIC < 2$  were retained (Table 3). Both models included TN,  
441 whereby the number of species increased as TN decreased ( $p < 0.001$ ). In the 2nd model,  
442 revetment was included but it had no significant effect ( $p > 0.05$ ).

443

## 444 **Discussion**

### 445 **Species composition**

446 The 11 species detected in all five rivers are common in Japan, and some of them (e.g., *C.*  
447 *carpio* and *M. cephalus*) have a worldwide distribution [44, 45]. Some, such as *A. flavimanus*

448 and *Takifugu* spp., can tolerate various environmental conditions [46, 47]. On the contrary, the  
449 endemic species *C. takatsuensis* was found only in a single habitat (i.e., the Takatsu River; S2  
450 Table), confirming its known limited distribution [48]. This species is registered as an  
451 endangered species on the IUCN red list together with seven other species found in this study  
452 (<https://www.iucnredlist.org>). It is of particular importance that the endangered species were  
453 successfully detected by the eDNA survey as it is a non-intrusive method for both the  
454 environment and the subjects [14]. Therefore, eDNA could be applied not only for  
455 biodiversity research, but also to detect rare, endangered species [36]. Also, tropical to  
456 subtropical species (e.g., *Caranx ignobilis* [49]; *Spratelloides gracilis* [50]), only occurred in  
457 the Sendai River (S2 Table), which is located at the southernmost sampling station of the  
458 study. These results indicate that eDNA successfully reflects biological and geographical  
459 features.

460           Our eDNA analysis detected *K. punctatus* and *E. japonicus* in all estuaries (S2 Table).  
461 This result is consistent with the known distribution of these species; the former is distributed  
462 in estuaries from Tohoku southward and the latter in coastal areas across east Asia [33]. On  
463 the contrary, the herring *Clupea pallasii*, which is an important fisheries species in Japan, was  
464 not detected here as it is distributed in the north of Japan [33] and, hence, outside our study  
465 area. These results indicate that the eDNA survey adequately reflects coastal fish distribution.  
466 *S. melanostictus* was detected in all estuaries except the southernmost Sendai River estuary  
467 (S2 Table). This result is consistent with the ecology of *S. melanostictus*, which is known to  
468 migrate from south to north in summer. Our survey was conducted in June and July, and  
469 therefore it was not expected that *S. melanostictus* would be present in the Sendai River  
470 estuary, the southernmost observation point of this study. This finding indicates that a  
471 sequential eDNA survey can detect fish migration if a multipoint observation system is  
472 established, which would be useful especially for commercially important species.

473

## 474 **Environmental conditions and biodiversity**

475 Biodiversity is closely related to the environmental conditions [10]. The results of GLMs  
476 showed that salinity affected the proportion of freshwater and seawater fishes, which varied  
477 among the five rivers. Specifically, no freshwater species eDNA samples were detected in the  
478 Tama River, which can be explained by the sampling stations being near the coast and salinity  
479 being over 20 (Table 1; Fig 1c). The proportion of seawater species accounted for more than  
480 50% at high tide but decreased notably at low tide (Fig 2c). The Sendai River showed a very  
481 small proportion of freshwater species at the river mouth, which is relatively wide (>1 km),  
482 compared with the other four rivers (Figs 1f and 2f). It is believed that seawater easily enters  
483 into rivers with wide mouths, which causes freshwater from the river to disperse and dilute  
484 across the adjacent coastal areas. As a result, brackish and seawater species accounted for  
485 more than 90% of hits in this case.

486 Besides the width of rivers, tidal range is another factor with a strong influence on  
487 species composition. The tidal ranges are very small in the Sea of Japan [51], ranging from 6  
488 cm for the Aka River to 55 cm for the Takatsu River, on the day of the sampling  
489 ([www.jma.go.jp](http://www.jma.go.jp)). In contrast, the tidal range of the Tama, Miya, and Sendai Rivers, which are  
490 located on the Pacific coast, was 167 cm, 67 cm, and 227 cm, respectively. Not surprisingly,  
491 salinity and number of species differed between high and low tides in the Sendai River (Table  
492 1; Fig 2f). In the Tama River, the number of species did not differ between high and low tides;  
493 however, seawater species decreased at low tide (Fig 2c).

494 Species composition in the Aka River differed remarkably between the river mouth  
495 and coastal area; the proportion of freshwater species was about 30–40% at the river mouth  
496 but decreased to 8–10% in the coastal area, whereas seawater species increased from 18–19%  
497 at the river mouth to 42–60% in the coastal area. This pattern can also be explained by the

498 width of the river mouth, which is very narrow (*ca.* 100 m) and thus affects species  
499 composition (Figs 1b and 2b). A similar trend was observed for the Takatsu River, which also  
500 has a narrow river mouth (<300 m); freshwater species decreased and seawater species  
501 increased in the coastal area. The proportion of seawater species was especially small at the  
502 river mouth of the Takatsu River, where water sampled from the bridge located about 1 km  
503 away from the river mouth had a salinity of 0.1 at both high and low tides (Table 1; Figs 1e  
504 and 2e). In fact, GLM analysis revealed that salinity had a significant effect on the proportion  
505 of freshwater and seawater species (Table 2).

506         Biodiversity was high at the river mouth of the Aka River, and in the coastal area of  
507 the Takatsu River (Fig 2b and e; S2 Table). As the number of species was almost identical at  
508 the river mouth of both rivers (34–37 species and 32–33 species, respectively), the observed  
509 change in biodiversity could be explained by two phenomena. First, as mentioned above,  
510 there are fewer freshwater species in the coastal area of the Aka River. Second, marine  
511 biodiversity is higher in the Takatsu River because it is located in the southern part of Japan  
512 and in general biodiversity increases toward lower latitudes [52]. GLM results supported the  
513 increase in number of seawater species when water temperature increased (Table 2).

514         Composition and number of species were less straightforward for the Miya River,  
515 reflecting its complex geography and environment (Fig 1d). For example, the number of  
516 species was highest at the station 500 m along the left of the river mouth (Fig 2d), which can  
517 be explained by the junction of two rivers, the Miya River and the Tokita River. However, the  
518 number of species was lowest at the station 500 m to the right of the river mouth, where no  
519 freshwater species were detected; the reason for this was not clear. The narrow river mouth  
520 beside the sampling station (R1) might prevent the flow of freshwater to the right side of the  
521 coast, but salinity was lower on the right side than on the left side, and some freshwater  
522 species were detected at the station 1 km to the right. One of the limitations and weaknesses

523 of eDNA is the low amount of extracted DNA, which may not be enough for amplification  
524 and comprehensive species detection, as well as the presence of inhibitors such as humic acid,  
525 which might affect the results [14]. Therefore, although generally accurate, eDNA results  
526 might not always reflect all species present and other factors should be considered [53, 54].

527 Human activity exerts a large influence on the environment and biodiversity [7, 8].  
528 Water quality is closely related to the biodiversity of aquatic animals [11]. Using nutrient  
529 concentrations (TN and TP) and revetment rate as indices of human activity and urbanization,  
530 we determined the impact of humans on biodiversity. GLM results indicated that TN  
531 significantly affected biodiversity, whereas the revetment rate had no effect (Table 3). The  
532 Tama River, which had the lowest biodiversity (Fig 2a), had the highest values for TN, TP,  
533 and revetment rates (Fig 3). The degree of urbanization of the Tama and Miya Rivers can be  
534 inferred not only from the concentration of nutrients and revetment rate but also from satellite  
535 images (Fig 1c and d). Even though the shoreline of the Sendai River has been extensively  
536 modified for flood control so that its revetment rate is now as high as for the Miya River, the  
537 surrounding area of the Sendai River has remained untouched and the nutrient concentration  
538 remains low (Figs 1 and 3). The Miya River showed relatively high biodiversity because of its  
539 location in the southern part of Japan along the Pacific coast, which is affected by the  
540 Kuroshio warm current. In comparison, even though it is located in the northern part of Japan,  
541 biodiversity was quite high in the Aka River (Fig 2a), which can be explained by the vastly  
542 pristine environment of the river (Fig 1b). This is an important result as it indicates that efforts  
543 to conserve the environment can also improve biodiversity. Both the Takatsu and Sendai  
544 Rivers showed high biodiversity with low human effect and geographical location (Figs 1, 2,  
545 and 3).

546

547 **Fig 3. Human effects.** Nutrients (mean  $\pm$  SD) including (a) total nitrogen [mg/L] and (b) total

548 phosphorus [mg/L] of the five rivers based on 2016 data obtained from the Ministry of the  
549 Environment, Japan (<https://water-repo.env.go.jp/water-repo/>). (c) Revetment rate [%] of the  
550 five rivers calculated using Google Earth Pro (2018 Google Image Landsat/Copernicus, US  
551 Dept of State Geographer Data SIO, NOAA, U. S. Navy, NGA, GEBCO). Bars show standard  
552 deviations.

553

## 554 **Determination of sp. and spp.**

555 In cases whereby information was insufficient to determine the exact species, these were  
556 classified at the genus level (*Genus* sp.). If the species could not be confirmed either by  
557 sequencing or distribution, and more than two candidate species were possible, they were  
558 classified as *Genus* spp. Thus, *Carassius* spp. included the candidate species *C. auratus*, *C.*  
559 *cuvieri*, *C. gibelio*, and *C. sp.* CBM ZF 11717, all or only some of which could exist at the  
560 stations in the study. *Cypselurus* spp. might include *C. heterurus*, *C. hiraii*, and *C. opisthopus*.  
561 The genus *Cypselurus* was not supposed to be on the list as its habitat is far from the coast  
562 and *Cypselurus* species are found in several Japanese dishes. However, the sampling period  
563 covered the spawning season of this genus and this could influence the eDNA survey, so we  
564 decided to include it as a detected species. *Sebastes* spp. included *S. inermis*, *S. proriger*, *S.*  
565 *oblongus*, and *S. schlegelii*. *Hexagrammos* spp. included *H. agrammus*, *H. lagocephalus*, *H.*  
566 *otakii*, and *H. stelleri*. *Abudefduf* spp. included *A. sexfasciatus* and *A. vaigiensis*.  
567 *Repomucenus* spp. included *R. beniteguri* and *R. omatipinnis*. *Acentrogobius* spp. included *A.*  
568 *pflaumii* and *A. virgatulus*. *Rhinogobius* spp. included *R. brunneus*, *R. flumineus*, *R. giurinus*,  
569 and *R. sp.* BF. *Tridentiger* spp. included *T. brevispinis* and *T. obscurus*. *Auxis* spp. included *A.*  
570 *rochei* and *A. thazard*. *Scomber* spp. included *S. australasicus* and *S. japonicus*. *Ostracion* spp.  
571 included *O. cubicus*, *O. immaculatus*, and *O. meleagris*. *Takifugu* spp. was probably *T.*  
572 *alboplumbeus* but could be also *T. flavipterus*, *T. pardalis*, *T. poecilonotus*, *T. porphyreus*, *T.*



573 *rubripes*, *T. stictonotus*, and *T. xanthopterus* (S2 Table).

574

## 575 **Conclusion**

576 The present study demonstrates that environmental DNA is a convenient tool for monitoring  
577 the distribution, migration, and diversity of fishes. By simply collecting 1 L of water, we  
578 successfully detected 182 species including commercially important species, covering a wide  
579 range of areas in a short period. The number and list of species detected by the eDNA method  
580 reflect the ecology of each fish and environmental conditions, such as eutrophication and  
581 temperature, in each river. We believe further development of the eDNA technique will offer  
582 an alternative method for accurate and non-invasive monitoring of aquatic life.

583

## 584 **Acknowledgments**

585 We are grateful to Dr. Komei Kadowaki and Mr. Shingo Takada for their help with fieldwork,  
586 Dr. Aya Yamazaki and Dr. Natsuko Kondo for guidance during molecular experiments and  
587 genetic analysis, Dr. Yoshiaki Kai and Dr. Yumi Henmi for confirming the species list, and Ms.  
588 Yuka Hayakawa for help with data analysis and arrangement.

589

590

591

592

593

594

595

596

## 597 **References**

- 598 1. Pikitch EK, Santora C, Babcock EA, Bakun A, Bonfil R, Conover DO, et al. Ecosystem-  
599 based fishery management. *Science*. 2004; 305 (5682): 346-347.
- 600 2. Lewison RL, Crowder LB, Read AJ, Freeman SA. Understanding impacts of fisheries  
601 bycatch on marine megafauna. *Trends Ecol Evol*. 2004;19: 598-604.
- 602 3. Ginsburg RN. Proceedings of the colloquium on global aspects of coral reefs: *Health,*  
603 *Hazards and History* (Ed.) Miami: University of Miami; 1994.
- 604 4. Roberts CM, McClean CJ, Veron JE, Hawkins JP, Allen GR, McAllister DE, et al. Marine  
605 biodiversity hotspots and conservation priorities for tropical reefs. *Science*. 2002; 295  
606 (5558): 1280-1284.
- 607 5. Pimentel D, Harvey C, Resosudarmo P, Sinclair K, McNair M, Crist S, et al. ... Blair, R.  
608 Environmental and economic costs of soil erosion and conservation benefits. *Science*.  
609 1995; 267 (5201): 1117-1123.
- 610 6. Smith GC, Covich AP, Brasher AMD. An ecological perspective on the biodiversity of  
611 tropical island stream. *BioScience*. 2003; 53: 1048-1051.
- 612 7. Young J, Watt A, Nowicki P, Alard D, Clitherow J, Henle K, et al. Towards sustainable  
613 land use: identifying and managing the conflicts between human activities and  
614 biodiversity conservation in Europe. *Biodiver Conserv*. 2005; 14: 1641-1661.
- 615 8. Chapin III FS, Zavaleta ES, Eviner VT, Naylor RL, Vitousek PM, Reynolds HL, et al.  
616 Consequences of changing biodiversity. *Nature*. 2000; 405: 234-242.
- 617 9. Folke C, Holling CS, Perrings C. Biological diversity, ecosystem, and human scale. *Ecol*  
618 *Appl*. 1996; 6(4): 1018-1024.
- 619 10. Diana JS. Aquaculture production and biodiversity conservation. *BioScience*. 2009; 59:  
620 27–38.

- 621 11. Needles LA, Lester SE, Ambrose R, Andren A, Beyeler M, Connor MS, et al. Managing  
622 bay and estuarine ecosystem for multiple services. *Estuaries and Coasts*. 2015; 38: 35-48.
- 623 12. Fujii K, Doi H, Matsuoka S, Nagano M, Sato H, Yamanaka H. Environmental DNA  
624 metabarcoding for fish community analysis in backwater lake; comparison of capture  
625 methods. *PLOS ONE*. 2019; 14(1): e0210357.
- 626 13. Sigsgaard EE, Carl H, Møller PR, Thomsen PF. Monitoring the near-extinct European  
627 weather loach in Denmark based on environmental DNA from water samples. *Biol  
628 Conserv*. 2015; 183: 46-52.
- 629 14. Thomsen PF, Willerslev E. Environmental DNA – An emerging tool in conservation for  
630 monitoring past and present biodiversity. *Biol Conserv*. 2015; 183: 4-18.
- 631 15. Dejean T, Valentini A, Miquel C, Taberlet P, Bellemain E, Miaud C. Improved detection  
632 of an alien invasive species through environmental DNA barcoding: the example of the  
633 American bullfrog *Lithobates catesbeianus*. *J Appl Ecol*. 2012; 49: 953-959.
- 634 16. Keskin, E. Detection of invasive freshwater fish species using environmental DNA survey.  
635 *Biochem System Ecol*. 2014; 56: 68-74.
- 636 17. Ficetola GF, Miaud C, Pompanon F, Taberlet P. Species detection using environmental  
637 DNA from water samples. *Biol Lett*. 2008; 4: 423-425.
- 638 18. Dejean T, Valentini A, Duparc A, Pellier-Cuit S, Pompanon F, Taberlet P, Miaud C.  
639 Persistence of environmental DNA in freshwater ecosystems. *PLOS ONE*. 2011; 6:  
640 e23398.
- 641 19. Jerde C, Mahon A, Chadderton W, Lodge D. Sight-unseen detection of rare aquatic  
642 species using environmental DNA. *Conserv Lett*. 2011; 4: 150e157.
- 643 20. Thomsen PF, Kielgast J, Iversen LL, Wiuf C, Rasmussen M, Gilbert MT, et al.  
644 Monitoring endangered freshwater biodiversity using environmental DNA. *Mol Ecol*.  
645 2012; 21: 2565e2573.

- 646 21. Andersen K, Bird KL, Rasmussen M, Haile J, Breuning-Madsen H, Kjaer KH, et al.  
647 Metabarcoding of ‘dirt’ DNA from soil reflects vertebrate biodiversity. *Mol Ecol.* 2012;  
648 21:1966-1979.
- 649 22. Fujiwara A, Matsushashi S, Doi H, Yamamoto S, Minamoto T. Use of environmental DNA  
650 to survey the distribution of an invasive submerged plant in ponds. *Freshw Sci.* 2016; 35:  
651 748-754.
- 652 23. Taberlet P, Coissac E, Hajibabaei M, Reiseberg LH. Environmental DNA. *Mol Ecol.*  
653 2012; 21:1789-1793.
- 654 24. Itakura H, Wakiya R, Yamamoto S, Kaifu K, Sato T, Minamoto T. Environmental DNA  
655 analysis reveals the spatial distribution, abundance, and biomass of Japanese eels at the  
656 river-basin scale. *Aquat Conserve.* 2019; 2019: 1-13.
- 657 25. Pflieger MO, Rider SJ, Johnston CE, Janosik AM. Saving the doomed: Using eDNA to aid  
658 in detection of rare sturgeon for conservation (Acipenseridae). *Glob Ecol Conserv.* 2016;  
659 8: 99-107.
- 660 26. Miya M, Sato Y, Fukunaga T, Sado T, Poulsen JY, Sato K, et al. MiFish, a set of  
661 universal PCR primers for metabarcoding environmental DNA from fishes: detection of  
662 more than 230 subtropical marine species. *Royal Soc Open Sci.* 2015; 2: 15008.
- 663 27. Miya M, Minamoto T, Yamanaka H, Oka SI, Sato K, Yamamoto S, et al. Use of a filter  
664 cartridge for filtration of water samples and extraction of environmental DNA. *JoVE.*  
665 2016; 117: e54741.
- 666 28. Edgar RC. Search and clustering orders of magnitude faster than BLAST. *Bioinformatics.*  
667 2010; 26: 2460–2461.
- 668 29. Callahan BJ, McMurdie PJ, Holmes SP. Exact sequence variants should replace  
669 operational taxonomic units in marker-gene data analysis. *ISME J.* 2017; 11: 2639–2643.
- 670 30. Katoh K, Toh H. Recent developments in the MAFFT multiple sequence alignment

- 671 program. *Brief Bioinformatics*. 2008; 9: 286–298.
- 672 31. Kumar S, Stecher G, Tamura K. MEGA7: molecular evolutionary genetics analysis  
673 version 7.0 for bigger datasets. *Mol Biol Evol*. 2016; 33: 1870–1874.
- 674 32. Hosoya K. *Freshwater fishes of Japan*. Tokyo, Japan: Yama-Kei Publishers; 2015. (in  
675 Japanese)
- 676 33. Nakabo T. *Fishes of Japan with pictorial keys to the species*. 3<sup>rd</sup> ed. Kanagawa, Japan:  
677 Tokai University Press; 2013. (in Japanese)
- 678 34. Nakajima J. *Loaches of Japan*. Tokyo, Japan: Yama-Kei Publishers; 2017. (in Japanese)
- 679 35. Andruszkiewicz EA, Starks HA, Chavez FP, Sassoubre LM, Block BA, Boehm AB.  
680 Biomonitoring of marine vertebrates in Monterey Bay using eDNA metabarcoding. *PLOS*  
681 *ONE*. 2017; 12: e0176343.
- 682 36. Takahara T, Minamoto T, Yamanaka H, Doi H, Kawabata Z. Estimation of fish biomass  
683 using environmental DNA. *PLOS ONE*. 2012; 7(4): 1-8.
- 684 37. Yamanaka H, Minamoto T, Takahara T, Uchii K, Doi H. Environmental DNA analysis in  
685 field research. *Jpn J Ecol*. 2016; 66: 601-611. (in Japanese)
- 686 38. Barnes MA, Turner CR, Jerde CL, Renshaw MA, Chadderton WL, Lodge DM.  
687 Environmental conditions influence eDNA persistence in aquatic system. *Environ Sci*  
688 *Technol*. 2014; 48: 1819-1827.
- 689 39. Robin X, Turck N, Hainard A, Tiberti N, Lisacek F, Sanchez J-C, Müller M. pROC: an  
690 open-source package for R and S+ to analyze and compare ROC curves. *BMC Bioinform*.  
691 2011; 12: 77.
- 692 40. Fox J, Weisberg S. *Companion to Applied Regression*. 2019; 2: 24. Available from  
693 <https://cran.r-project.org/web/packages/car/car.pdf>.
- 694 41. Bartoń K. *Multi-Model Inference*. 2019; 1: 30. Available from [https://cran.r-](https://cran.r-project.org/web/packages/MuMIn/MuMIn.pdf)  
695 [project.org/web/packages/MuMIn/MuMIn.pdf](https://cran.r-project.org/web/packages/MuMIn/MuMIn.pdf).

- 696 42. Burnham KP, Anderson DR. Model selection and multimodel inference: a practical  
697 information-theoretic approach. New York: Springer; 2002.
- 698 43. R Core Team. R: A language and environment for statistical computing: R Foundation for  
699 Statistical Computing. Vienna, Austria; 2018. <https://www.R-project.org/>.
- 700 44. Barus V, Penaz M, Kohlmann K. *Cyprinus carpio* (Linnaeus, 1758). In: Banarescu PM,  
701 Paepke HJ, editors. The Freshwater Fishes of Europe Vol. 5/ III: Aula-Verlag:  
702 Wiebelsheim; 2002. pp 85-179.
- 703 45. Shen KN, Jamandre BW, Hsu CC, Tzeng WN, Durand J-D. Plio-Pleistocene sea level and  
704 temperature fluctuation in the northwestern Pacific promoted speciation in the globally-  
705 distributed flathead mullet *Mugil cephalus*. BMC Evol Biol. 2011; 11: 83.
- 706 46. Greenfield BK, Jahn A. Mercury in San Francisco Bay forage fish. Environ Pollut. 2010;  
707 158(8): 2716-2724.
- 708 47. Lee KM, Kaneko T, Aida K. Low-salinity tolerance of juvenile fugu *Takifugu rubripes*.  
709 Fish Sci. 2005; 71: 1324-1331.
- 710 48. Kimizuka Y, Kobayashi H, Mizuno N. Geographic distributions and karyotypes of *Cobitis*  
711 *takatsuensis* and *Niwaella delicta* (Cobitidae). Jpn J Ichthyol. 1982; 29: 305-310.
- 712 49. Smith GC, Parrish JD. Estuaries as nurseries for the jacks *Caranx ignobilis* and *Caranx*  
713 *melampygus* (Carangidae) in Hawaii. ECSS. 2002; 55: 347-359.
- 714 50. Durieux EDH, Meekan MG, Ponton D, Vigliola L. Temperature, selective mortality and  
715 early growth in the short-lived clupeid *Spatelloides gracilis*. J Fish Biol. 2009; 74(4): 921-  
716 938.
- 717 51. Kasai A, Kurikawa Y, Ueno M, Robert D, Yamashita Y. Salt-wedge intrusion of seawater  
718 and its implication for phytoplankton dynamics in the Yura Estuary, Japan. ECSS. 2010;  
719 86(3): 408-414.
- 720 52. Kotwicki L, Szymelfenig M, Troch MD, Urban-Malinga B, Weslawski M. Latitudinal

- 721 biodiversity pattern of meiofauna from sandy littoral beaches. *Biodivers Conserv.* 2005;  
722 14: 461-474.
- 723 53. Deiner K, Altermatt F. Transport distance of invertebrate environmental DNA in a natural  
724 river. *PLOS ONE.* 2014; 9: e88786.
- 725 54. Merkes CM, McCalla SG, Jensen NR, Gaikowski MP, Amberg JJ. Persistence of DNA in  
726 carcasses, slime and avian feces may affect interpretation of environmental DNA data.  
727 *PLOS ONE.* 2014; 9: e113346.

728

729

### 730 **Supporting information**

731 **S1 Table.** Summary of data preprocessing steps and subsequent taxon assignment using  
732 pipeline analysis (MiFish ver. 2.3)

733

734 **S2 Table.** List of species detected at the sampling stations. Plus (+) represents occurrence. HT:  
735 river mouth at high tide; LT: river mouth at low tide; L1: left 500 m; L2: left 1 km; R1: right  
736 500 m; R2: right 1 km. †: endangered species according to the IUCN

737 (<https://www.iucnredlist.org>). ‡: endangered species according to the Ministry of the

738 Environment of Japan (<http://ikilog.biodic.go.jp/Rdb/env>). ††: endangered species according

739 to both classifications

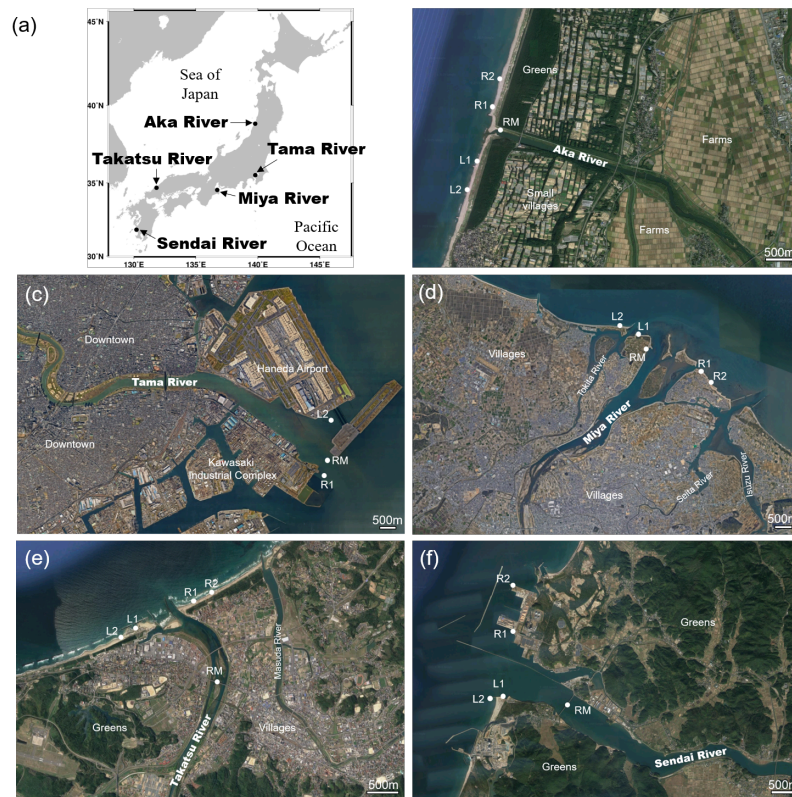



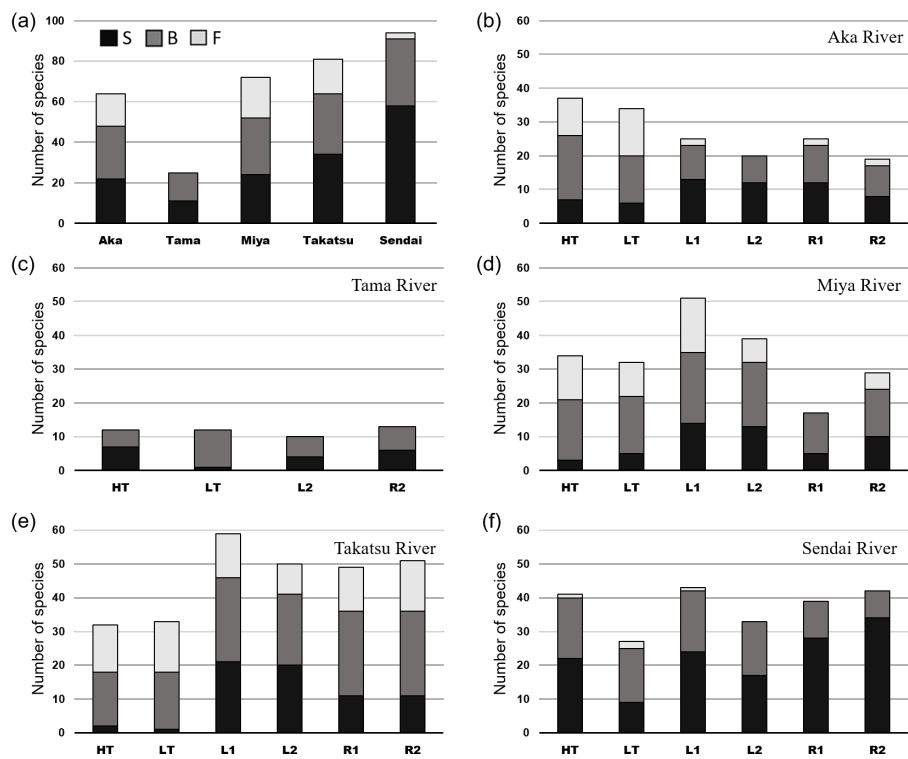

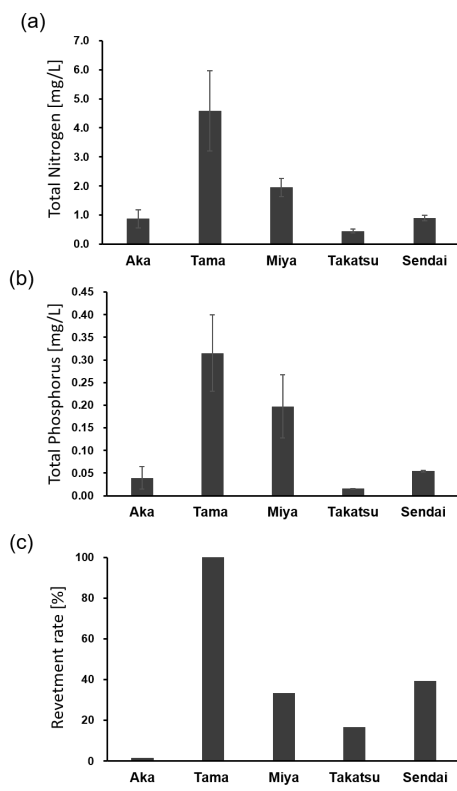

Source: https://www.biorxiv.org/content/10.1101/2020.03.22.997809v1.full.pdf
